# Supplementary material for: CNC–Al2O3–Ti: a new unit for micro scale strain sensing
Source: Royal Society of Chemistry journal article supplement (doi:10.1039/c6ra22361c), 2016-01-01
Supplement: c6ra22361c1.pdf [file c6ra22361c1.pdf]

**Electronic Supplementary Information**

**CNC-Al<sub>2</sub>O<sub>3</sub>-Ti: a new unit for micro scale strain sensing**

Chengwei Li, Lujun Pan\*, Chenghao Deng and Peng Wang

School of Physics and Optoelectronic Technology, Dalian University of Technology,

No. 2 Linggong Road, Ganjingzi District, Dalian 116024, PR China

Corresponding e-mail: [lpan@dlut.edu.cn](mailto:lpan@dlut.edu.cn)

## 1. The stability of Ti film in air

Figure S1 shows the Raman spectra of Ti and TiO<sub>2</sub> film deposited on the silicon substrate. Four main peaks are observed in the Raman spectra of TiO<sub>2</sub>: one at approximately 520 cm<sup>-1</sup>, is the characteristic peak of the Si. The other three are at approximately 142 cm<sup>-1</sup>, 395 cm<sup>-1</sup> and 637 cm<sup>-1</sup>, known as the peak of TiO<sub>2</sub>. From the Raman spectra of the same Ti film deposited on a Si substrate as grown and a week after. It is found that there is no peak of TiO<sub>2</sub>, only the peak of Si. This proves that Ti film is not easily oxidized in air.

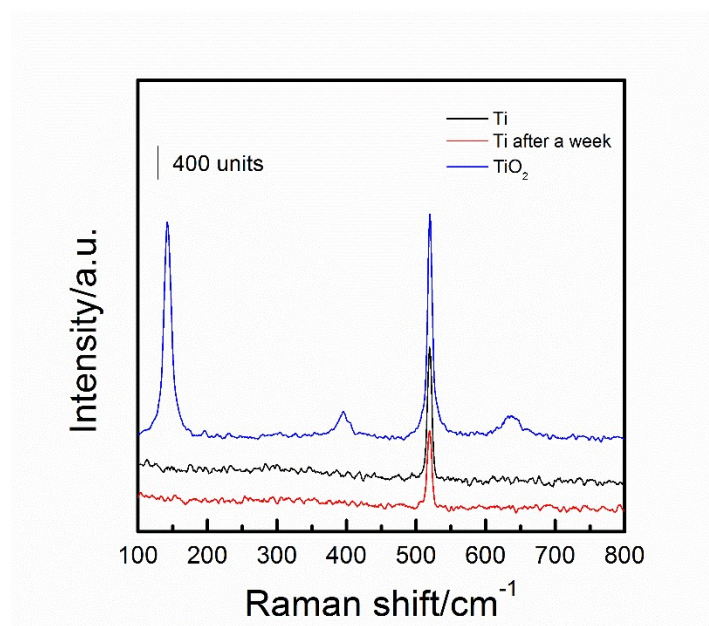

**Figure S1.** The Raman spectra of Ti and TiO<sub>2</sub> film on the silicon substrate
